# Supplementary material for: Maternal Retinoids Increase PDGFRα+ Progenitor Population and Beige Adipogenesis in Progeny by Stimulating Vascular Development
Source: PubMed Central journal article supplement — eBioMedicine. 2017 Apr 4;18:288–99. doi: 10.1016/j.ebiom.2017.03.041 (PMC5405191; doi:10.1016/j.ebiom.2017.03.041), 2017-04-04
Supplement: mmc1.pdf [file mmc1.pdf]

## Supplemental data

### Maternal Retinoids Increase PDGFR $\alpha$ <sup>+</sup> Progenitor Population and Beige Adipogenesis in Progeny by Stimulating Vascular Development

Bo Wang, Xing Fu, Xingwei Liang, Zhixiu Wang, Qiyuan Yang, Tiande Zou, Wei Nie, Junxing Zhao, Pengfei Gao, Mei-jun Zhu, Jeanene M. de Avila, Joseph Maricelli, Buel D. Rodgers, and Min Du

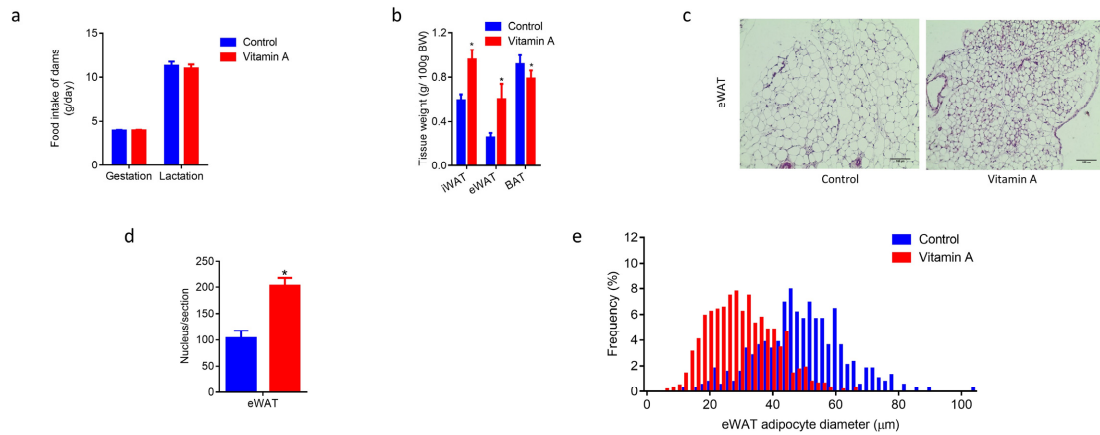

**Figure S1. Maternal vitamin A supplementation affects adipose tissue deposition and morphology.** For the MVA offspring, (a) Adipose tissue weight was calculated as the ratio to body weight. (b) Representative images of H&E stained eWAT. (c) Average number of nucleus per section. (d) Distribution of adipocytes size in eWAT. (e) Food intake of mother mice during pregnancy and lactation. Data presented are mean  $\pm$  SEM,  $n = 6$ , unpaired two-tail t-test,  $*p < 0.05$ .

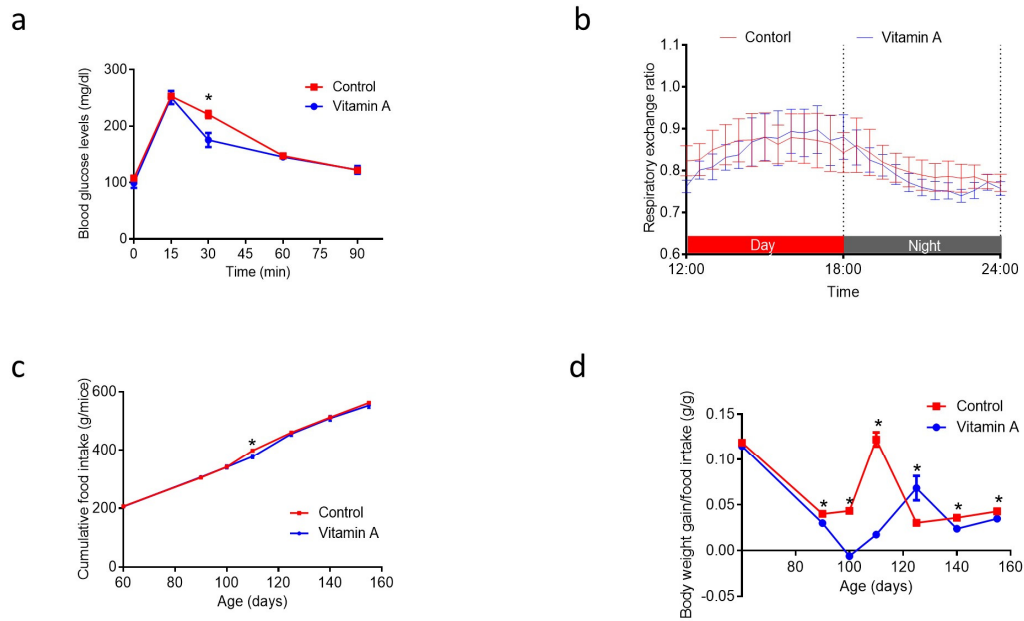

**Figure S2. Maternal vitamin A supplementation prevents offspring obesity development induced by high fat diet.** MVA offspring were fed a high fat diet (HFD, 45% energy from fat) from 30 days to 155 days old. **(a)** Glucose tolerance test at the beginning of HFD feeding ( $n = 3$ ). **(b)** Respiratory exchange ratio after HFD feeding ( $n = 4$ ). **(c)** Food intake during HFD feeding ( $n = 3$ ). **(d)** Ratio of body weight gain/food intake ( $n = 3$ ). Data presented are mean  $\pm$  SEM, unpaired two-tail t-test,  $*p < 0.05$ .

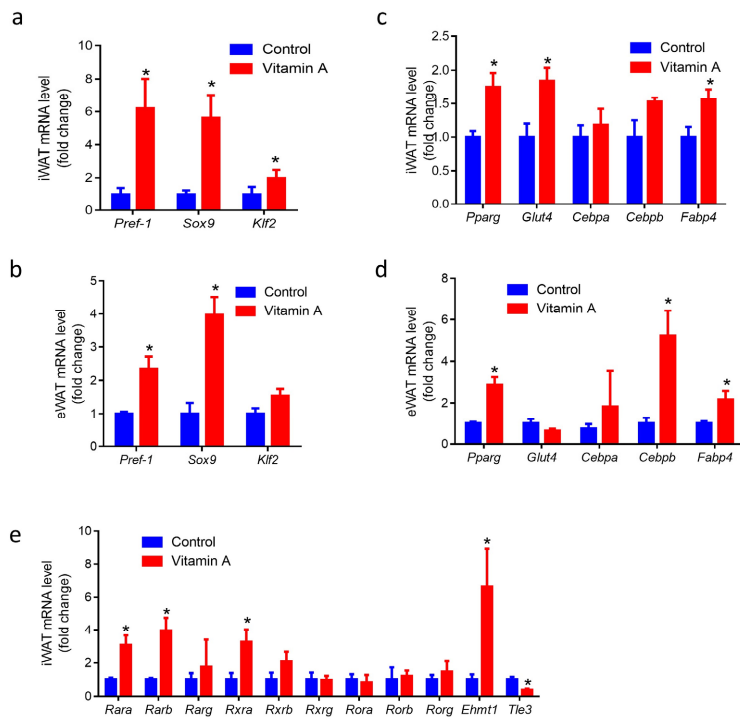

**Figure S3. Maternal vitamin A supplementation promotes brown/beige adipogenesis in both white and brown adipose tissue. (a-b)** mRNA levels of preadipose marker genes in iWAT (a) and eWAT (b). **(c-d)** mRNA levels of adipocyte markers in iWAT (c) and eWAT (d). **(e)** mRNA levels of RARs, RORs and other adipose related genes in iWAT. Data presented are mean  $\pm$  SEM, n = 6, unpaired two-tail t-test, \* $p < 0.05$ .

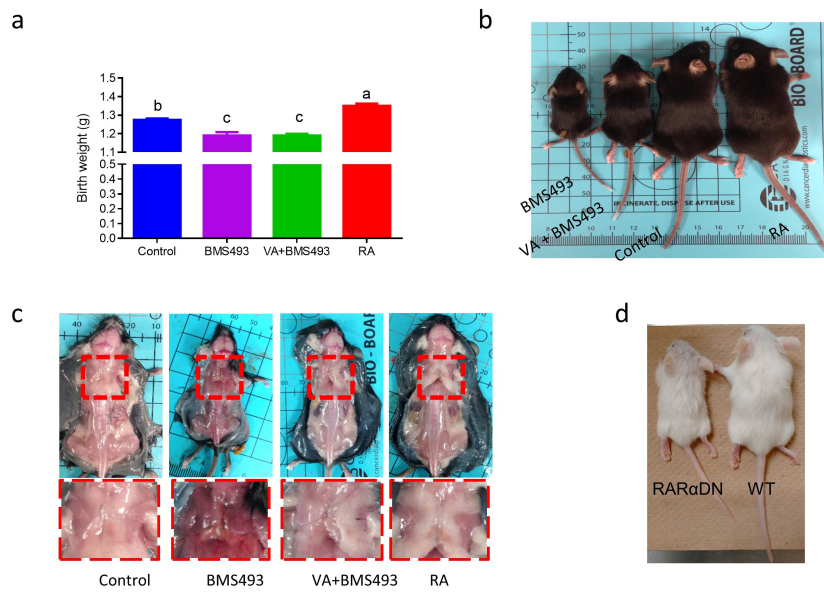

**Figure S4. Retinoic acid signaling is required for fetal adipose tissue development.** Pregnant mice were injected with BMS493 or RA at E10.5 and 13.5, and one BMS493 treated group was supplemented with vitamin A during gestation. **(a)** Birth weight. **(b)** Representative images of offspring at weaning **(c)** Representative images of subcutaneous fat tissue at weaning. **(d)** Representative images of weaning *Pdgfra-cre/ER/RARαDN* offspring. Data presented are mean  $\pm$  SEM, n = 6, ANOVA, bars with different letters differ significantly.

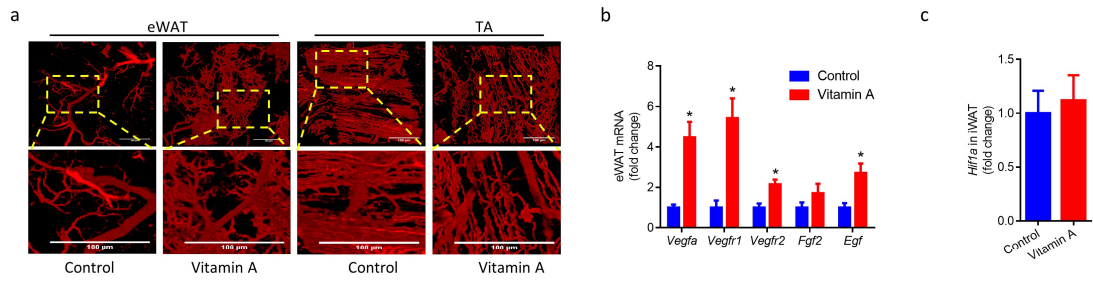

**Figure S5. Maternal retinoic acid promotes vasculature in adipose tissues.** For the MVA weaning offspring, **(a)** Blood vessels in eWAT and *Tibialis anterior* (TA) muscle stained by Dil. **(b)** mRNA levels of angiogenic genes in eWAT. **(c)** Expression of *Hif1a* in iWAT.  $n = 6$ . Data presented are mean  $\pm$  SEM, unpaired two-tail t-test,  $*p < 0.05$ .

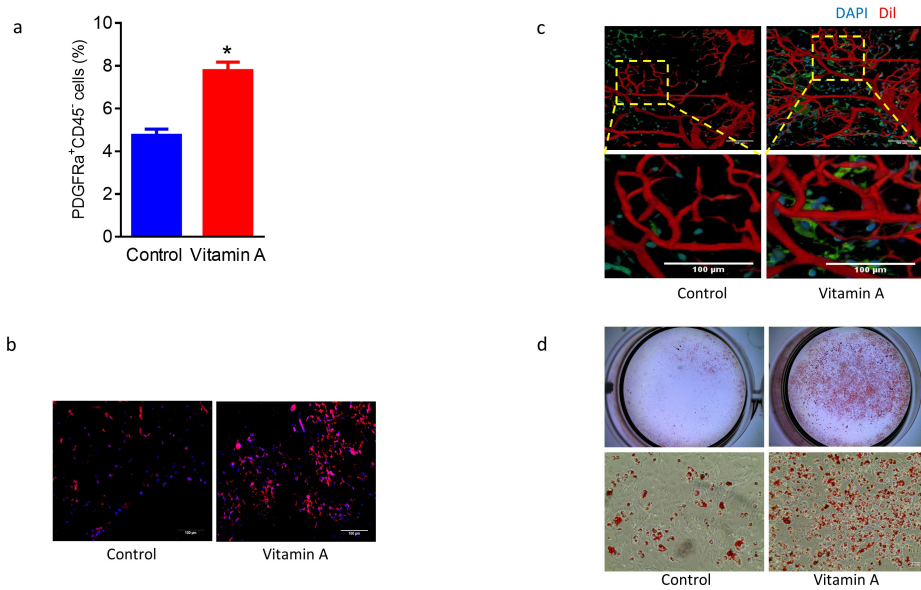

**Figure S6. Maternal vitamin A increases PDGFR $\alpha$ <sup>+</sup> population in adipose tissue of weanling offspring.** (a) Quantification of PDGFR $\alpha$ <sup>+</sup>CD45<sup>-</sup> cells in iWAT analyzed by flow cytometry. (b) Images of IHC staining of eWAT section using anti-PDGFR $\alpha$  antibody. (c) Representative images showing blood vessels and PDGFR $\alpha$ <sup>+</sup> cells in iWAT. (d) iWAT derived SVCs differentiated for 6 days in brown adipogenic medium, and adipocytes were stained by Oil-Red O. Data presented are mean  $\pm$  SEM, unpaired two-tail t-test, n = 4, \* $p$  < 0.05.

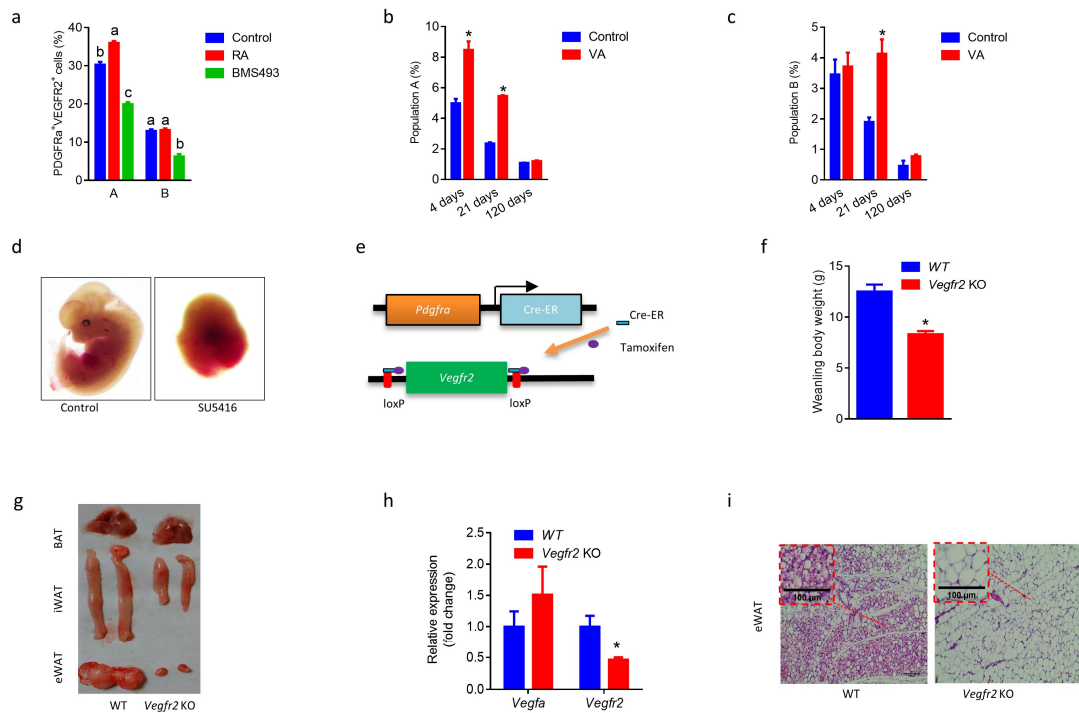

**Figure S7. VEGF signaling plays an important role in RA regulation of adipogenesis.** (a-c) Quantification of PDGFR $\alpha$ <sup>+</sup>VEGFR2<sup>+</sup> cells in iWAT of RA, BMS493 injected (a) or MVA offspring at different ages (b and c) (n = 4). (d) Representative images showing E12.5 embryos which were prenatally treated with 10 mg/kg BW SU5416 at E10.5. (e-i) *Vegfr2* was knocked out in PDGFR $\alpha$ <sup>+</sup> cells at E10.5 by an injection of 20 mg/kg BW tamoxifen to the pregnant mothers (e). Body weight was measured at weaning (f, n = 6). Representative images of adipose tissue mass were showed (g). mRNA expression of *Vegfa* and *Vegfr2* was measured by qRT-PCR (h, n =6). eWAT sections were stained by H&E (i). Data presented are mean  $\pm$  SEM, unpaired two-tail t-test (b-c, f and h) \* $p$  < 0.05 or ANOVA (a), bars with different letters differ significantly.

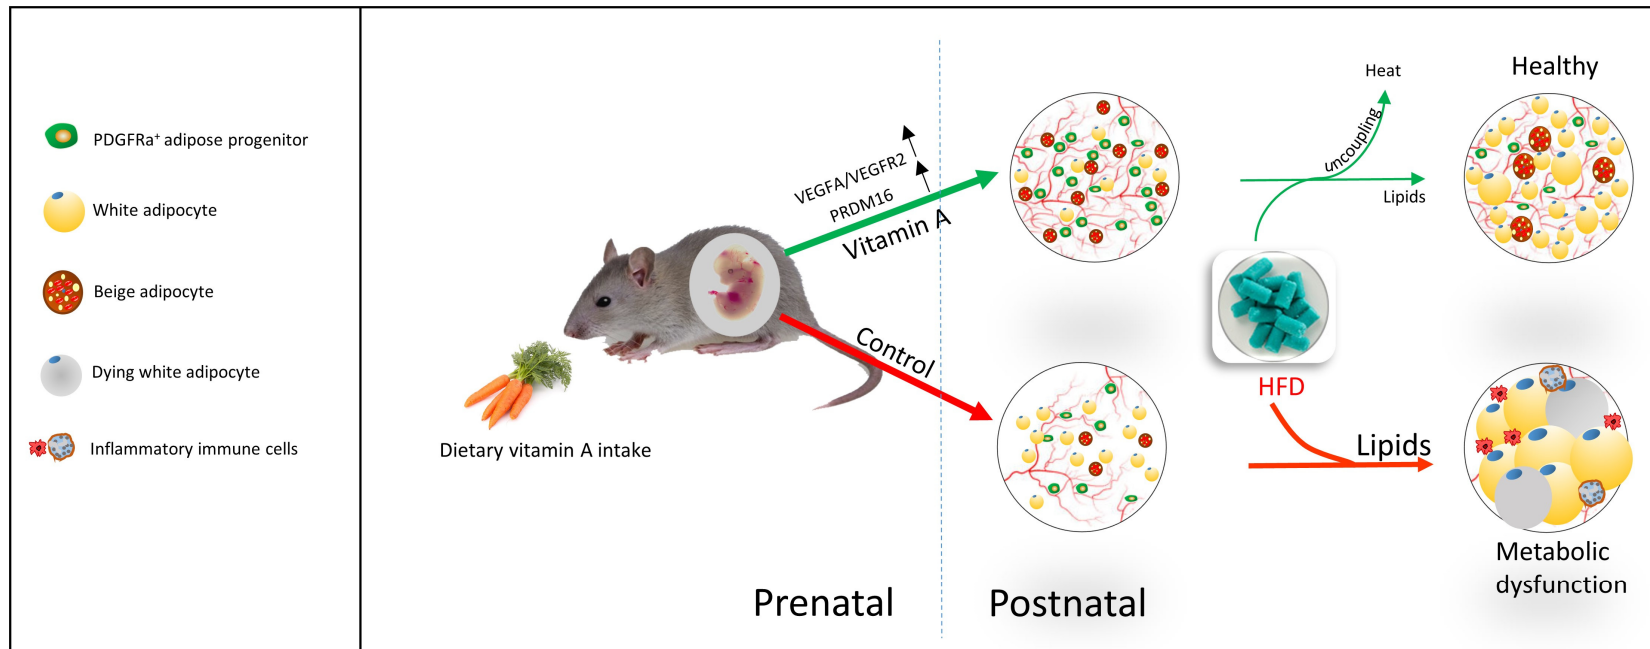

**Figure S8. Diagram showing that maternal supplementation of vitamin A promotes angiogenesis and beige adipogenesis, which protects offspring from high fat-induced obesity.**



**Supplemental Table 1. qPCR primer sequences.**

| Gene name     | Forward                    | Reverse                      | Product size (bp) |
|---------------|----------------------------|------------------------------|-------------------|
| <i>Zfp423</i> | GTCACCAGTGCCAGGAAGAAGAC    | AACATCTGGTTGCACAGTTTACACTCAT | 144               |
| <i>Pref1</i>  | TGACAATGTCTGCAGGTGCCAT     | TATTTTCGAGAATTTCCCGTCC       | 145               |
| <i>Sox9</i>   | GGAAGTCGGTGAAGAACGGA       | GGACCCTGAGATTGCCCAGA         | 166               |
| <i>Klf2</i>   | TAGTGGTGTGGCTGGGGATA       | TTATGGCTCAAAGTAGCAGACT       | 178               |
| <i>Pparg</i>  | AGCTCCAAGAATACCAAAGTGCAT   | AGGTTCTTCATGAGGCCTGTTGTAGA   | 98                |
| <i>Cebpa</i>  | ATGAGAGAAGGAGGGGAGCAGG     | AGGTGGGAGAGGCGTGGAECTA       | 203               |
| <i>Fabp4</i>  | CGACAGGAAGGTGAAGAGCATCATA  | CATAAACTCTTGTGGAAATCACGCCT   | 158               |
| <i>Glut4</i>  | CTCTCAGGCATCAATGCTGTTTTCTA | CGAGACCAACGTGAAGACCGTATT     | 123               |
| <i>Prdm16</i> | CAGCACGGTGAAGCCATTC        | GCGTGCATCCGCTTGTG            | 87                |
| <i>Ucp1</i>   | ACTGCCACACTCCAGTCATT       | CTTTGCCTCACTCAGGATTGG        | 123               |
| <i>Pdgfra</i> | GGACTTACCCTGGAGAAGTGAGAA   | ACACCAGTTTGATGGATGGGA        | 78                |
| <i>Vegfa</i>  | TGGACCCTGGCTTACTGCT        | GCAGTAGCTTCGCTGGTAGA         | 126               |
| <i>Vegfr1</i> | GGCCCGGATATTTATAAAGAAC     | CCATCCATTTTAGGGGAAGTC        | 71                |
| <i>Vegfr2</i> | CAGTGGGATGGTCTTGTCAT       | ACGGTGGTCTGTGTCATC           | 177               |
| <i>Egf</i>    | GTTAGCACCATCCCTCATCC       | TCTGAGTGCAGCCGAAAG           | 246               |
| <i>Fgf2</i>   | GGCTGCTGGCTTCTAAGTGT       | GTCCCGTTTTGGATCCGAGT         | 153               |
| <i>Pgc1a</i>  | CCCTGCCATTGTTAAGACC        | TGCTGCTGTTCTGTTTTTC          | 161               |
| <i>Cidea</i>  | ATCACAACTGGCCTGGTTACG      | TACTACCCGGTGCCATTCT          | 136               |
| <i>Elovl3</i> | GATGGTTCTGGCACCATCTT       | CGTTGTTGTGGCATCCTT           | 73                |
| <i>Cox7a1</i> | CAGCGTCATGGTCAGTCTGT       | AGAAAACCGTGTGGCAGAGA         | 112               |
| <i>Rxra</i>   | TGGGGCTTGTGAGGTGTATTC      | CACCTGGGTAGAGAAGTCGAAA       | 96                |
| <i>Rxrb</i>   | GCGTCCTTCTCCATCGGTC        | CAAAGATGGCTCCCACGCCT         | 109               |
| <i>Rxrg</i>   | GAACCACGCGCAACAGAAC        | CTGCGTCTCCGTGACTAACA         | 81                |
| <i>Rara</i>   | TGGGGCGAGATGTACGAGA        | CTCGATGGAGTGGTTTGAGC         | 186               |
| <i>Rarb</i>   | CAGTGCCATACTGGTGTCT        | AGGGCTGTTAATCCAGGAGG         | 186               |
| <i>Rarg</i>   | CTGCATGGAATCGTTTGCC        | TCTCCACCGATTGTAGACTGG        | 152               |
| <i>Rora</i>   | CGCGGCGTAAAGGATGTATT       | CCGACCAAACCTGACAGCATC        | 286               |
| <i>Rorb</i>   | TCTCACAGCATTTGCCAGT        | AAGGTGGTGAGTGTGTGCAA         | 299               |
| <i>Rorg</i>   | TGCTGTCCTGGGCTACCCTAC      | CAAACCTGACAGCATCTCGGGAC      | 298               |
| <i>Tle3</i>   | CGGGCAAACCTCCAGGCAT        | AGCTGGTGAGGGGTGATGGGT        | 75                |
| <i>Ehmt1</i>  | GGCACCTTTGTCTGCGAATAC      | AGAACCAGCGTCAATGCAG          | 130               |
| <i>Hif1a</i>  | AGGATGAGTCTGAACGTCGAA      | AAACCATGTCGCGCTCATCT         | 298               |
| <i>18s</i>    | TTGTACACACCGCCCGTCGC       | CTTCTCAGCGCTCCGCCAGG         | 102               |
